# Supplementary figures and images for: Multimodal imaging of a liver-on-a-chip model using labelled and label-free optical microscopy techniques
Source: Royal Society of Chemistry journal article supplement (doi:10.1039/d4lc00504j), 2024-01-01

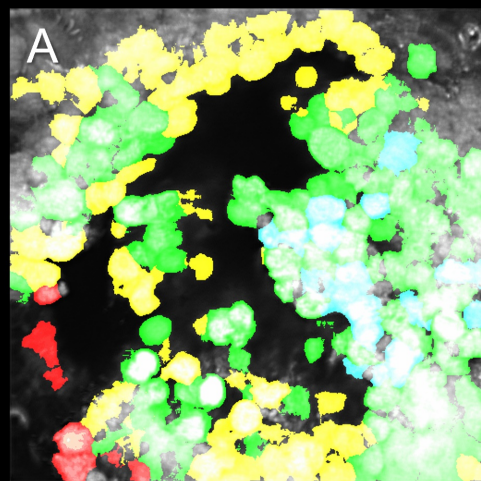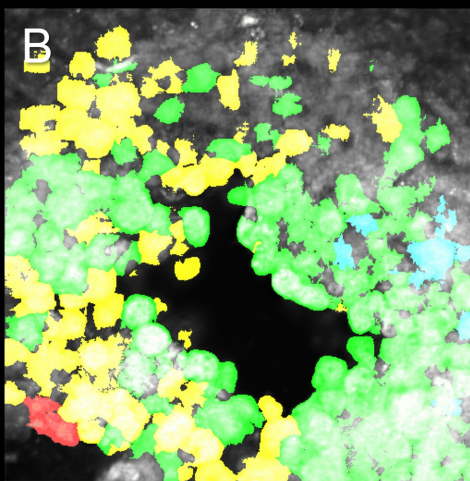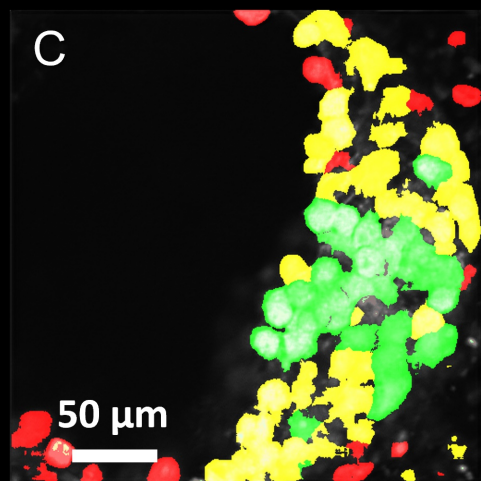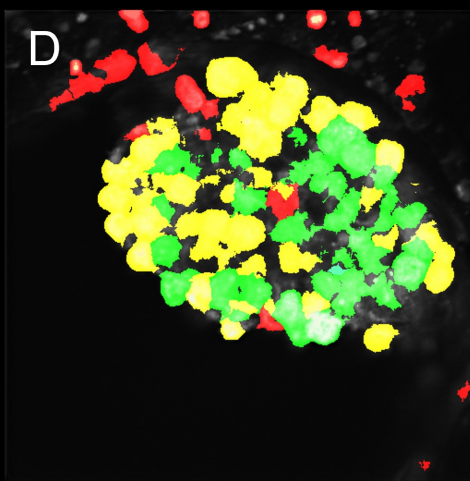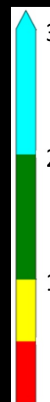

Supplement: d4lc00504j2.pdf [file d4lc00504j2.pdf]

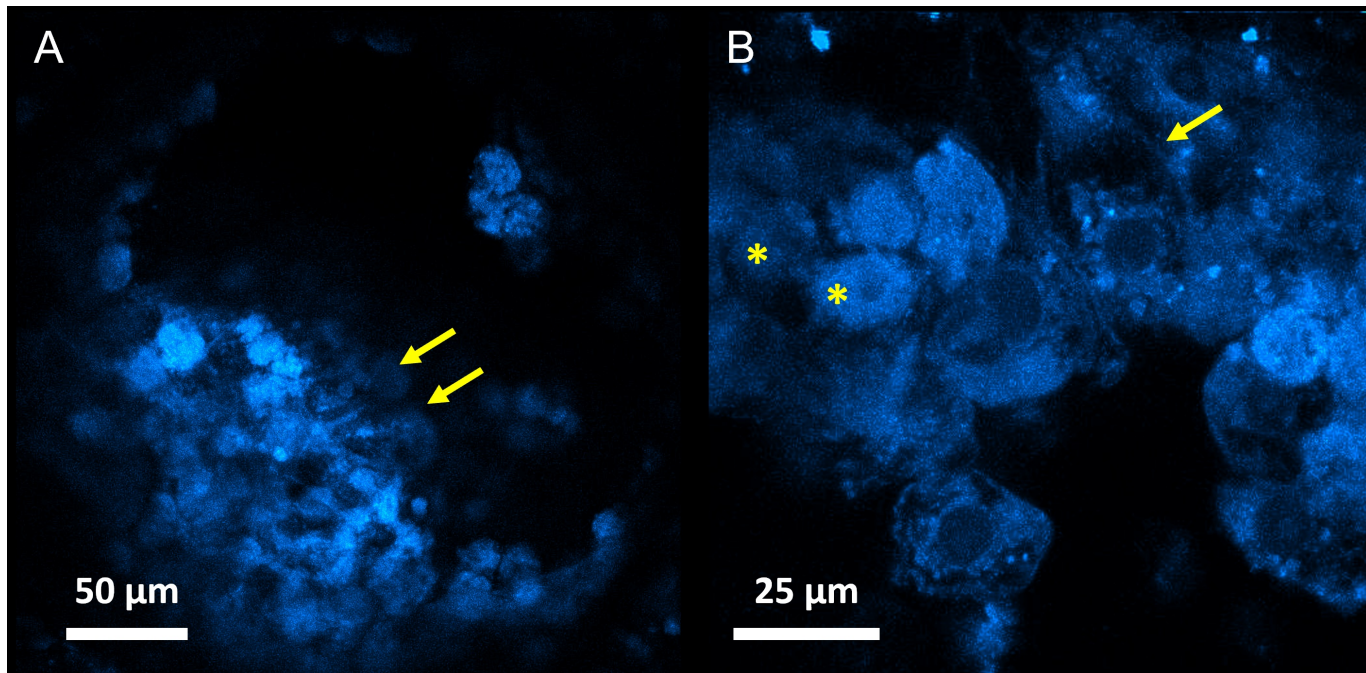

Supplement: d4lc00504j3.pdf [file d4lc00504j3.pdf]

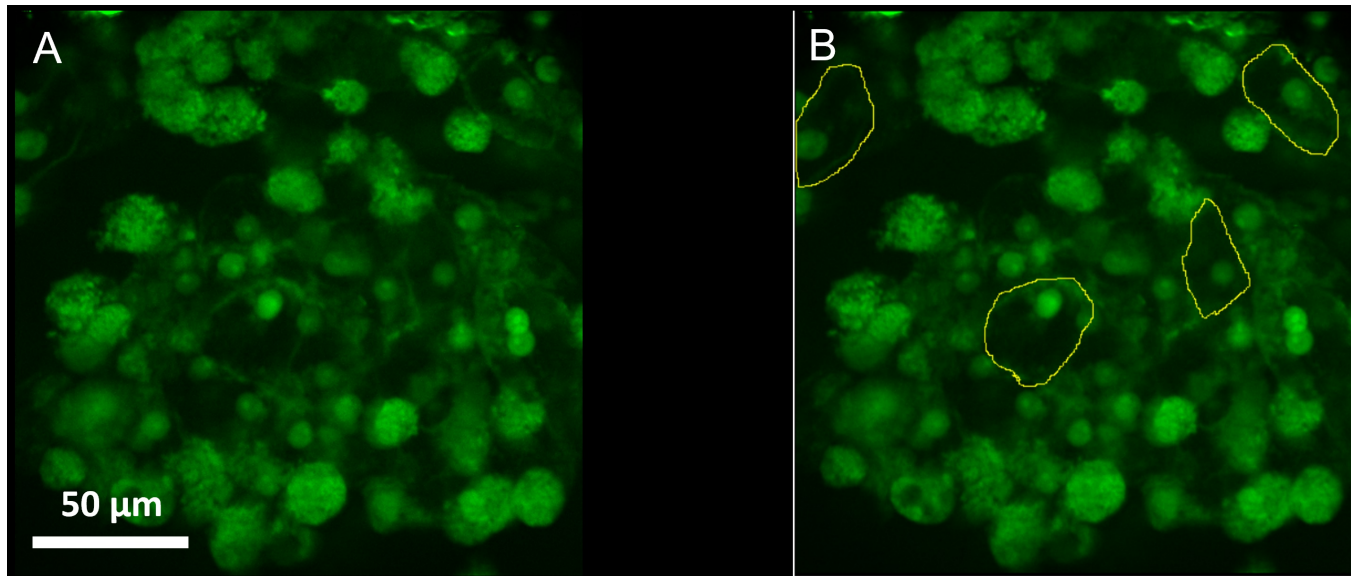

Supplement: d4lc00504j4.pdf [file d4lc00504j4.pdf]

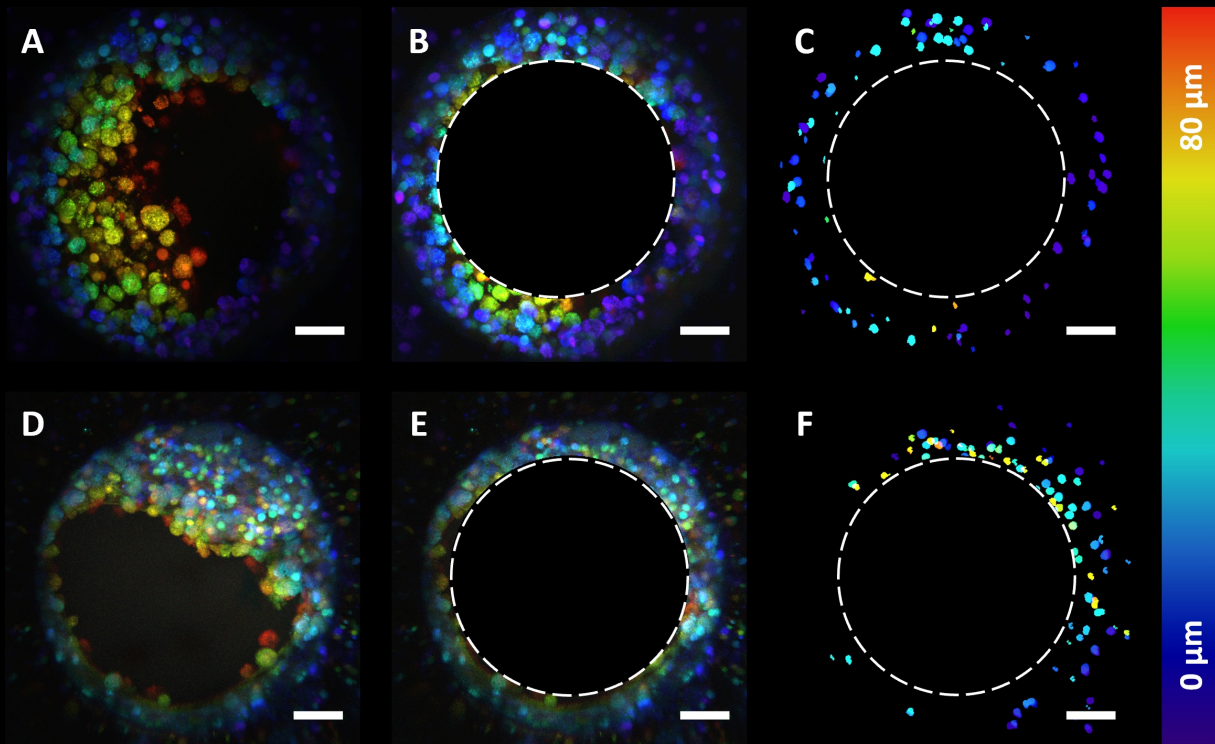

Single-photon fluorescence

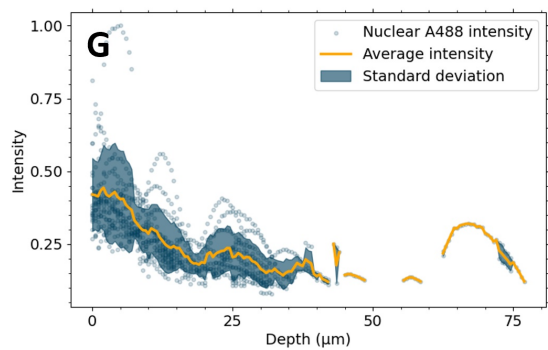

Two-photon fluorescence

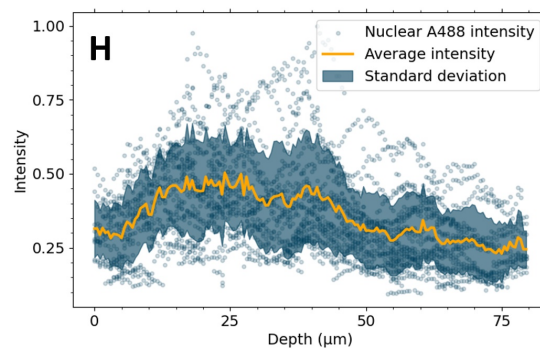

Supplement: d4lc00504j5.pdf [file d4lc00504j5.pdf]

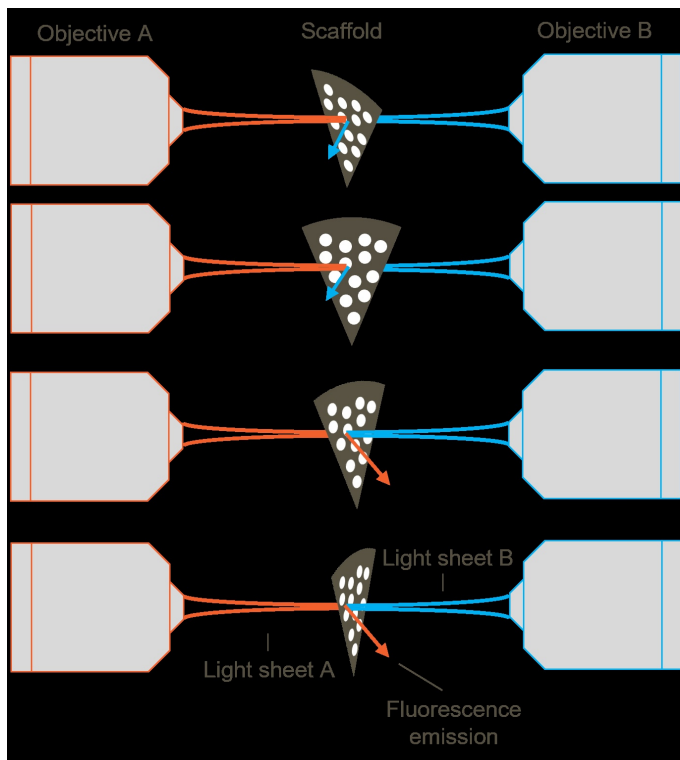

Supplement: d4lc00504j6.pdf [file d4lc00504j6.pdf]

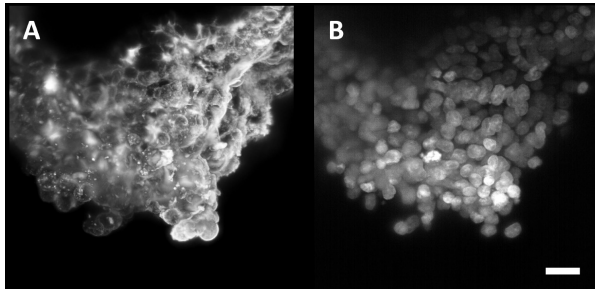

Supplement: d4lc00504j7.pdf [file d4lc00504j7.pdf]

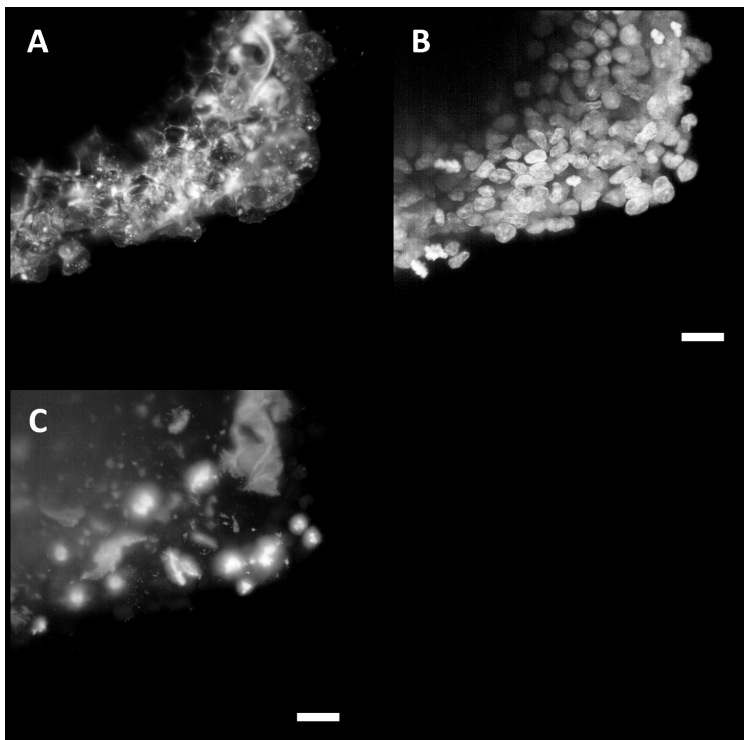

Supplement: d4lc00504j8.pdf [file d4lc00504j8.pdf]
